# Supplementary material for: The Antihypertensive Effects and Safety of LCZ696 in Patients with Hypertension: A Systemic Review and Meta-Analysis of Randomized Controlled Trials
Source: MDPI journal article supplement (doi:10.3390/jcm10132824), 2021-06-26
Supplement: s1 [file s1]

# The Antihypertensive Effects and Safety of LCZ696 in Patients with Hypertension: A Systemic Review and Meta-Analysis of Randomized Controlled Trials

Su-Kiat Chua <sup>1,2,3,†</sup>, Wei-Ting Lai <sup>2,3,†</sup>, Lung-Ching Chen <sup>2,3</sup> and Huei-Fong Hung <sup>2,3,\*</sup>

<sup>1</sup> School of Medicine, College of Medicine, Fu Jen Catholic University, New Taipei 24205, Taiwan; M006507@ms.skh.org.tw  
<sup>2</sup> Division of Cardiology, Department of Internal Medicine, Shin Kong Wu Ho-Su Memorial Hospital, Taipei 111045, Taiwan; M011645@ms.skh.org.tw (W.-T.L.); M010281@ms.skh.org.tw (L.-C.C.)  
<sup>3</sup> Department of Internal Medicine, Shin Kong Wu Ho-Su Memorial Hospital, Taipei 111045, Taiwan  
\* Correspondence: M000720@ms.skh.org.tw; Tel.: +886-2-2833-2211 (ext. 2084)  
† Both authors contribute equally to this work.

## Supplementary Data

Table S1. Search terms used in each database.

| PudMed database, MeSH term                                                                                                                                                                                                         |
|------------------------------------------------------------------------------------------------------------------------------------------------------------------------------------------------------------------------------------|
| Angiotensin receptor antagonists/ blockers; Angiotensin II receptor antagonists/ blockers; Anti hypertensive agents/ drugs; Hypertension; LCZ 696; neprilysin                                                                      |
| Embase database                                                                                                                                                                                                                    |
| Hypertension, high blood pressure, angiotensin receptor blockers, angiotensin receptor antagonists, angiotensin II receptor antagonists, angiotensin II receptor blockers, LCZ696, ARNI, angiotensin receptor neprilysin inhibitor |
| Cochrane database                                                                                                                                                                                                                  |
| Hypertension, high blood pressure, angiotensin receptor blockers, angiotensin receptor antagonists, angiotensin II receptor antagonists, angiotensin II receptor blockers, LCZ696, ARNI, angiotensin receptor neprilysin inhibitor |

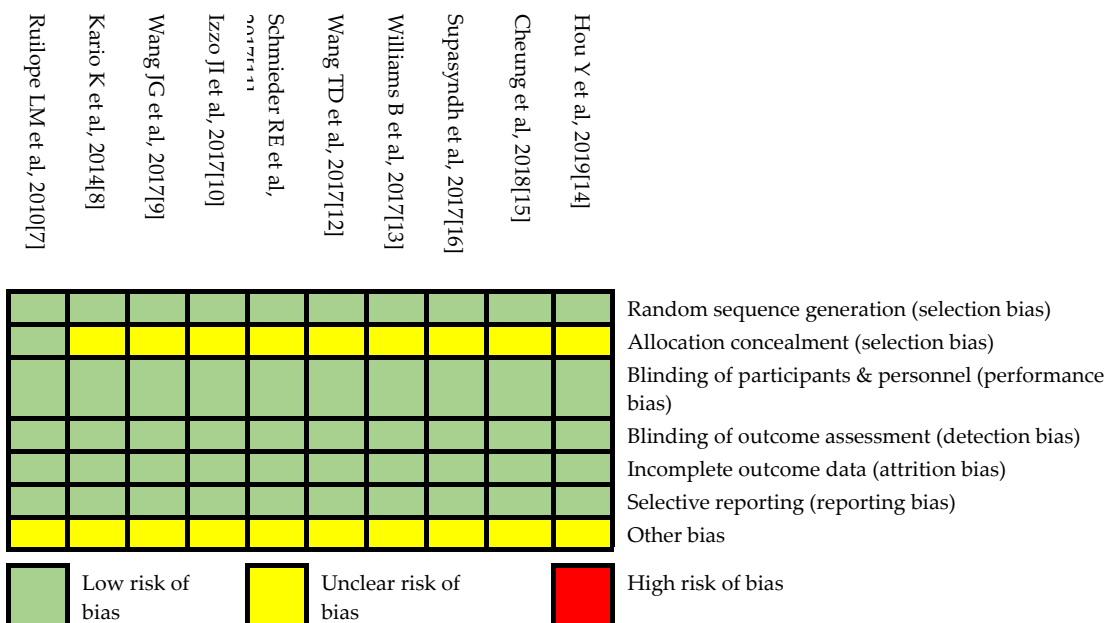

Figure S1. Methodological quality assessment.

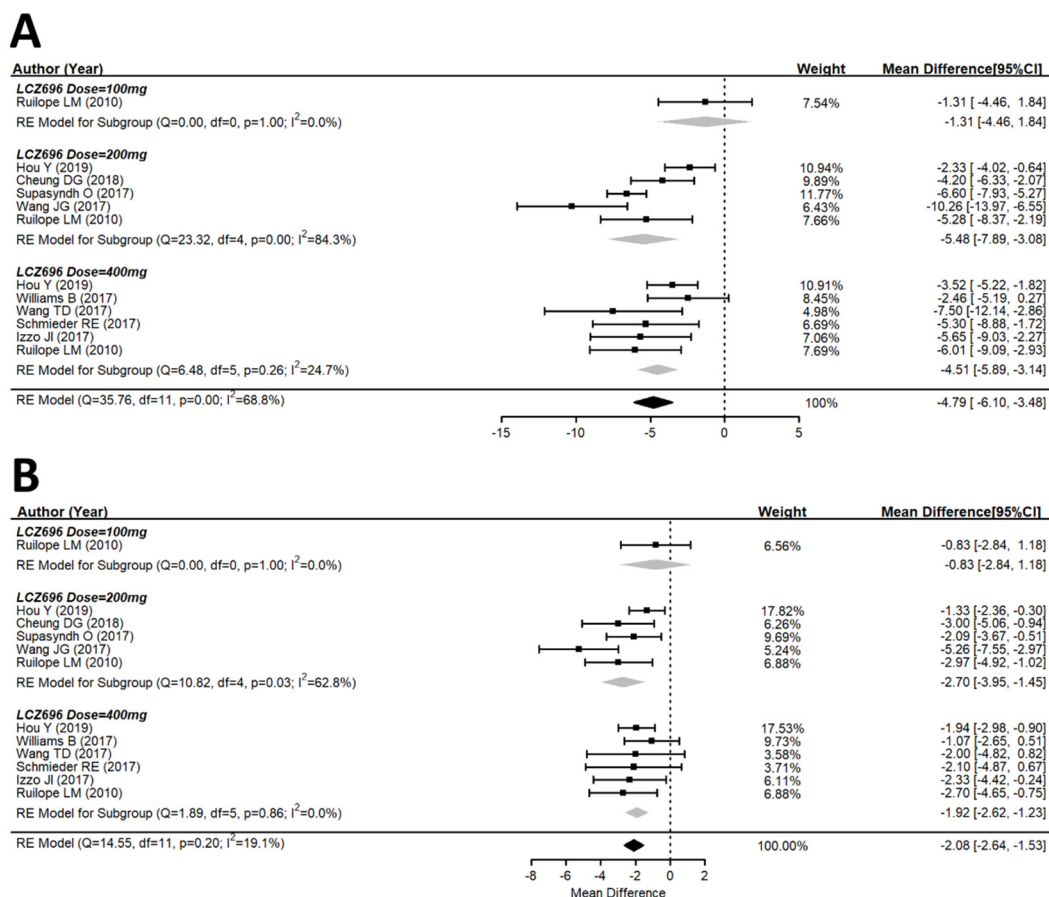

Figure S2. Forest plot of (A) msSBP and (B) msDBP. Comparisons of LCZ696 with a control group. msSBP, mean sitting systolic blood pressure; msDBP, mean sitting diastolic blood pressure.

**A**

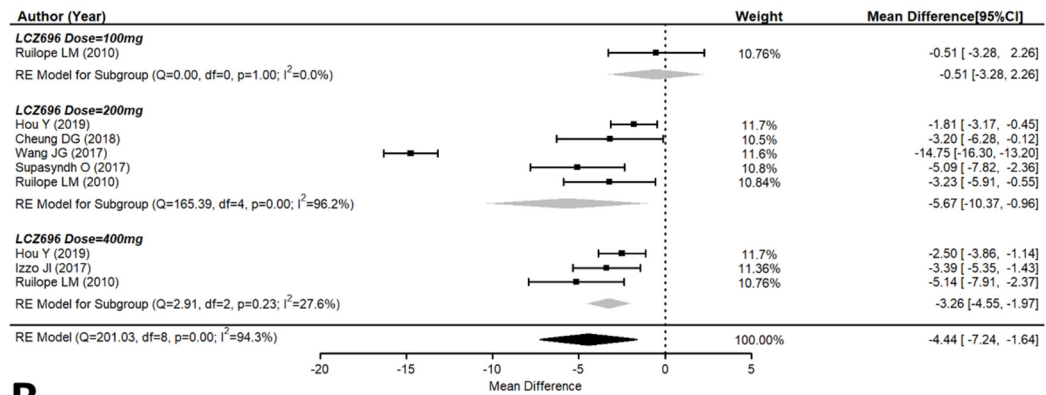

**B**

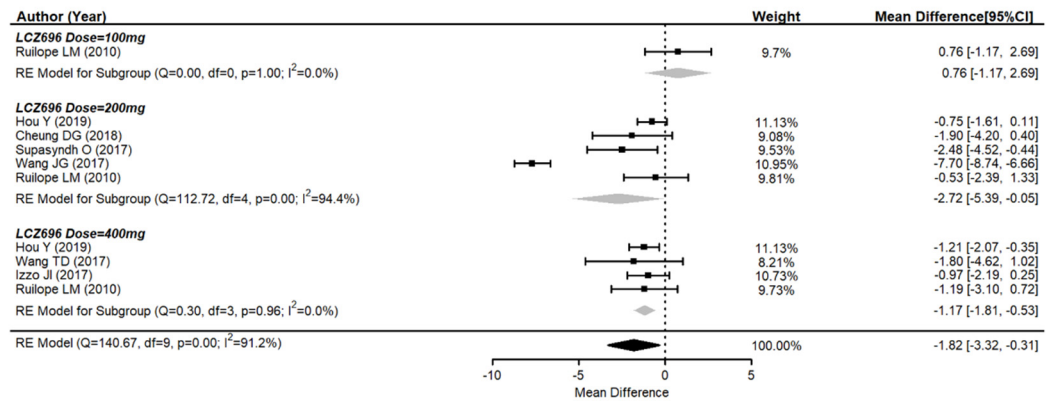

**Figure S3.** Forest plot of (A) maSBP and (B) maDBP. Comparisons of LCV696 with a control group. maSBP, mean ambulatory systolic blood pressure; maDBP, mean ambulatory diastolic blood pressure.

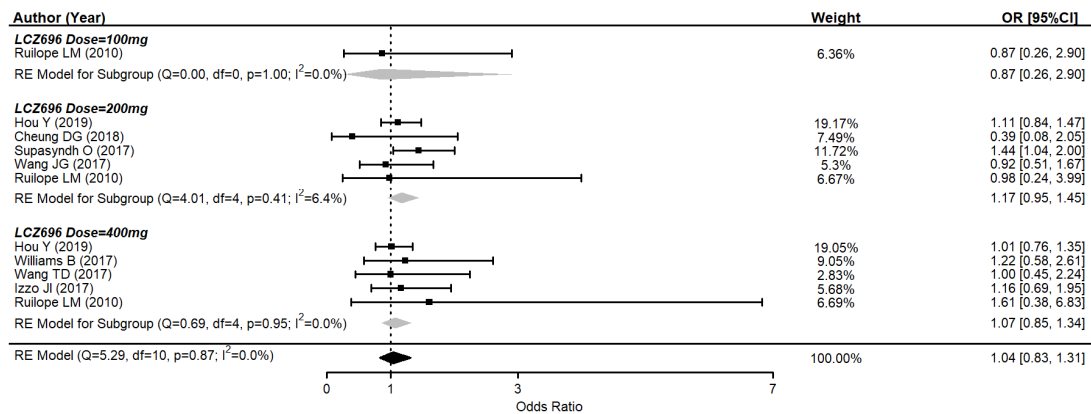

**Figure S4.** Forest plot of trial-defined adverse events. Comparisons between LCV696 with a control group.

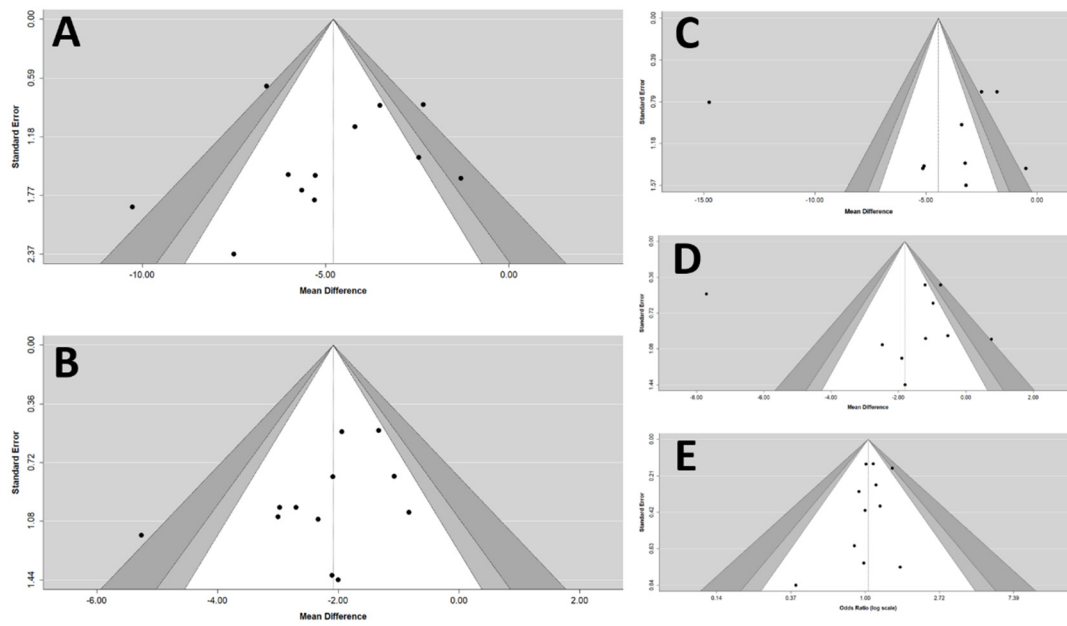

**Figure S5.** Funnel plots of (A) msSBP, (B) msDBP, (C) maSBP, and (D) maDBP. maSBP, mean ambulatory systolic blood pressure; maDBP, mean ambulatory diastolic blood pressure; msSBP, mean sitting systolic blood pressure; msDBP, mean sitting diastolic blood pressure.
